# Supplementary material for: Polyhedral monocarbaborane chemistry. Some C-phenylated seven, eight, nine, ten, eleven and twelve-vertex species
Source: Royal Society of Chemistry journal article supplement (doi:10.1039/b609908d), 2006-01-01
Supplement: b609908d.pdf [file b609908d.pdf]

**DFT B3LYP/6-31G\* calculated coordinates for *arachno*-PhCB<sub>8</sub>H<sub>13</sub> (compound 3) and *nido*-PhCB<sub>8</sub>H<sub>11</sub> (compound 4)**

**Cartesian coordinates for *arachno*-PhCB<sub>8</sub>H<sub>13</sub> (compound 3)**

|     |           |           |           |   |           |           |           |
|-----|-----------|-----------|-----------|---|-----------|-----------|-----------|
| 0 1 |           |           |           | H | 1.551385  | -0.760933 | 1.948076  |
| C   | -0.040998 | 1.648355  | -0.636372 | H | 0.720888  | -1.433549 | -1.299828 |
| B   | 1.441622  | 0.881215  | -0.161997 | H | 2.658563  | -1.476105 | -0.738376 |
| B   | 1.635726  | -0.894161 | -0.589550 | H | 2.406760  | 1.547498  | 0.017518  |
| B   | 0.977275  | -0.479973 | 0.947673  | H | 1.695309  | 0.189713  | -1.302521 |
| B   | 0.080119  | -1.650696 | -0.069290 | H | 0.010484  | 1.806413  | 1.742447  |
| B   | -1.677364 | -0.955737 | -0.585904 | C | -0.072594 | 3.829907  | -1.790638 |
| B   | -1.464439 | 0.867926  | -0.054917 | C | -0.064239 | 5.229392  | -1.753572 |
| B   | -0.830575 | -0.544126 | 0.927816  | C | -0.015634 | 5.896790  | -0.523849 |
| B   | 0.011941  | 0.980064  | 0.892329  | C | 0.024615  | 5.164703  | 0.668807  |
| C   | -0.032344 | 3.097821  | -0.597982 | C | 0.016260  | 3.765219  | 0.631741  |
| H   | -1.269206 | -1.403906 | -1.629599 | H | -0.110401 | 3.310767  | -2.747187 |
| H   | -2.737554 | -1.410449 | -0.292459 | H | -0.095547 | 5.798851  | -2.681288 |
| H   | 0.068060  | -2.833045 | 0.022089  | H | -0.009135 | 6.985388  | -0.495017 |
| H   | -1.375390 | -0.918614 | 1.913870  | H | 0.062423  | 5.683843  | 1.625356  |
| H   | -0.069909 | 1.295048  | -1.662451 | H | 0.047568  | 3.195760  | 1.559457  |
| H   | -2.391608 | 1.511010  | 0.313509  |   |           |           |           |
| H   | -1.858795 | 0.240638  | -1.137215 |   |           |           |           |

**+x,y,z, coordinates for *arachno*-PhCB<sub>8</sub>H<sub>13</sub> (compound 3)**

|    |           |           |           |   |           |           |           |
|----|-----------|-----------|-----------|---|-----------|-----------|-----------|
| 33 |           |           |           | H | 1.478898  | 2.132372  | -0.290254 |
| C  | 0.145169  | 0.292363  | 0.320019  | H | 2.837743  | -2.368332 | -0.510928 |
| B  | 0.967865  | -1.108464 | 0.930389  | H | 3.136296  | 0.325678  | 1.573345  |
| B  | 2.684680  | -0.868919 | 1.536690  | H | 3.250988  | -1.539544 | 2.334538  |
| B  | 2.443172  | -1.323933 | -0.107329 | H | 0.330615  | -2.026474 | 1.328914  |
| B  | 3.487636  | 0.091054  | 0.234139  | H | 1.527689  | -0.558012 | 2.038057  |
| B  | 2.730603  | 1.739262  | -0.506751 | H | 0.256314  | -1.218325 | -1.521688 |
| B  | 0.979385  | 1.112609  | -0.946719 | C | -2.152642 | 0.865164  | 1.016053  |
| B  | 2.496128  | 0.114904  | -1.202672 | C | -3.538989 | 0.733345  | 0.872299  |
| B  | 0.981644  | -0.637671 | -0.785282 | C | -4.063386 | -0.107802 | -0.116377 |
| C  | -1.290691 | 0.155836  | 0.171131  | C | -3.201434 | -0.817130 | -0.961299 |
| H  | 3.060283  | 2.091017  | 0.599742  | C | -1.815087 | -0.685311 | -0.817546 |
| H  | 3.210455  | 2.426531  | -1.351901 | H | -1.744737 | 1.519456  | 1.785102  |
| H  | 4.672683  | 0.131122  | 0.256568  | H | -4.209465 | 1.285101  | 1.529528  |
| H  | 2.976722  | -0.033757 | -2.277985 | H | -5.141765 | -0.210338 | -0.228197 |
| H  | 0.380508  | 0.970143  | 1.134714  | H | -3.609339 | -1.471423 | -1.730348 |
| H  | 0.377515  | 1.568856  | -1.862431 | H | -1.144612 | -1.237066 | -1.474775 |

**Cartesian coordinates for *nido*-PhCB<sub>8</sub>H<sub>11</sub> (compound 4)**

|     |           |           |           |   |           |          |           |
|-----|-----------|-----------|-----------|---|-----------|----------|-----------|
| 0 1 |           |           |           | H | -1.514305 | 1.702684 | -1.531591 |
| C   | -1.643010 | 0.000000  | 0.166666  | H | 1.185210  | 2.441205 | -0.020117 |
| B   | -0.910877 | 0.974736  | -0.878116 | H | -0.850371 | 1.705179 | 1.671492  |
| B   | 0.769091  | 1.383009  | -0.188835 | H | 1.415568  | 0.927863 | -1.253908 |
| B   | -0.536097 | 0.909848  | 0.902844  | C | -3.056579 | 0.000000 | 0.489656  |
| B   | -0.536097 | -0.909848 | 0.902844  | C | -4.009064 | 0.000000 | -0.536392 |
| B   | 0.769091  | -1.383009 | -0.188835 | C | -5.373889 | 0.000000 | -0.224540 |
| B   | -0.910877 | -0.974736 | -0.878116 | C | -5.786230 | 0.000000 | 1.113360  |
| B   | 1.007237  | 0.000000  | 0.983473  | C | -4.833746 | 0.000000 | 2.139407  |
| B   | 1.909773  | 0.000000  | -0.452185 | C | -3.468920 | 0.000000 | 1.827555  |
| H   | -0.391759 | 0.000000  | -1.626933 | H | -3.688321 | 0.000000 | -1.577087 |
| H   | 1.599936  | 0.000000  | 1.964320  | H | -6.114786 | 0.000000 | -1.022658 |
| H   | 3.057798  | 0.000000  | -0.505452 | H | -6.847869 | 0.000000 | 1.355936  |
| H   | -1.514305 | -1.702684 | -1.531591 | H | -5.154488 | 0.000000 | 3.180102  |
| H   | 1.185210  | -2.441205 | -0.020117 | H | -2.728023 | 0.000000 | 2.625673  |
| H   | -0.850370 | -1.705179 | 1.671492  |   |           |          |           |
| H   | 1.415568  | -0.927863 | -1.253908 |   |           |          |           |

**+x,y,z, coordinates for *nido*-PhCB<sub>8</sub>H<sub>11</sub> (compound 4)**

|    |           |           |           |   |           |           |           |
|----|-----------|-----------|-----------|---|-----------|-----------|-----------|
| 31 |           |           |           | B | 0.331150  | -1.497543 | -0.974736 |
| C  | -0.000537 | -0.265645 | 0.000000  | B | -2.327416 | -1.774491 | 0.000000  |
| B  | 0.331150  | -1.497543 | 0.974736  | B | -1.805231 | -3.387875 | 0.000000  |
| B  | -1.275399 | -2.343947 | 1.383009  | H | 0.572481  | -2.376161 | 0.000000  |
| B  | -1.275399 | -0.642395 | 0.909848  | H | -3.460045 | -1.599835 | 0.000000  |
| B  | -1.275399 | -0.642395 | -0.909848 | H | -2.500921 | -4.302651 | 0.000000  |
| B  | -1.275399 | -2.343947 | -1.383009 | H | 1.219550  | -1.453935 | -1.702684 |

Electronic Supplementary Information for Dalton Transactions  
This journal is © The Royal Society of Chemistry 2006

|   |           |           |           |   |           |          |          |
|---|-----------|-----------|-----------|---|-----------|----------|----------|
| H | -1.671788 | -2.554888 | -2.441205 | C | 2.693192  | 2.345164 | 0.000000 |
| H | -1.663365 | 0.091818  | -1.705179 | C | 1.931495  | 3.519821 | 0.000000 |
| H | -0.873193 | -3.523160 | -0.927863 | C | 0.533365  | 3.447501 | 0.000000 |
| H | 1.219550  | -1.453935 | 1.702684  | C | -0.103069 | 2.200523 | 0.000000 |
| H | -1.671788 | -2.554888 | 2.441205  | H | 2.649249  | 0.184471 | 0.000000 |
| H | -1.663365 | 0.091818  | 1.705179  | H | 3.780738  | 2.401419 | 0.000000 |
| H | -0.873193 | -3.523160 | 0.927863  | H | 2.426550  | 4.489790 | 0.000000 |
| C | 0.658627  | 1.025867  | 0.000000  | H | -0.059127 | 4.361216 | 0.000000 |
| C | 2.056758  | 1.098187  | 0.000000  | H | -1.190615 | 2.144268 | 0.000000 |
